# Supplementary material
Source: PubMed Central journal article supplement (PMC5561294)

1 **SUPPLEMENTARY INFORMATION**

2 Table S1. 16S rDNA read information from the different sampling sites.

| <b>Station ID</b> | <b>Reads</b> | <b>Unique sequences</b> | <b>OTU (3%)</b> |
|-------------------|--------------|-------------------------|-----------------|
| <b>MC</b>         | 26177        | 487                     | 281             |
| <b>PO1</b>        | 72436        | 768                     | 363             |
| <b>PO3</b>        | 69636        | 885                     | 319             |
| <b>SA1</b>        | 104893       | 1180                    | 530             |
| <b>SA2</b>        | 98852        | 1362                    | 715             |
| <b>SA3</b>        | 37991        | 746                     | 407             |
| <b>SA4</b>        | 55754        | 858                     | 440             |
| <b>SA5</b>        | 98552        | 1190                    | 510             |
| <b>SA6</b>        | 38323        | 522                     | 233             |
| <b>SA7</b>        | 58891        | 691                     | 354             |
| <b>SA8</b>        | 64970        | 867                     | 379             |
| <b>TA1</b>        | 151291       | 1155                    | 436             |
| <b>TA2</b>        | 143963       | 1189                    | 421             |
| <b>TG1</b>        | 62743        | 800                     | 333             |
| <b>TG2</b>        | 40506        | 601                     | 312             |
| <b>VE3</b>        | 83880        | 1076                    | 354             |

3

4

5 Table S2. Pairwise comparison of similarity (ANOSIM) among bacterial communities.

| <b>Cluster ID</b> | <b>R Statistic</b> | <b>P-Value</b> |
|-------------------|--------------------|----------------|
| <b>I- II</b>      | 1                  | <i>P</i> <0.05 |
| <b>I- III</b>     | 0.75               | <i>P</i> ≥0.05 |
| <b>I- IV</b>      | 1                  | <i>P</i> <0.05 |
| <b>I-MC</b>       | 1                  | <i>P</i> >0.05 |
| <b>II-III</b>     | 0.72               | <i>P</i> >0.05 |
| <b>II-IV</b>      | 0.47               | <i>P</i> <0.05 |
| <b>II-MC</b>      | 1                  | <i>P</i> >0.05 |
| <b>III-IV</b>     | 0.4                | <i>P</i> <0.05 |
| <b>III-MC</b>     | 1                  | <i>P</i> <0.05 |
| <b>IV-MC</b>      | 1                  | <i>P</i> >0.05 |

6

7

8

9

10

11

12

13

14

15

16

17

18

19

20 Table S3. OTUs contributing the most to the Bray-Curtis similarity index in Group I (A), II+III (B), and IV (C).  
 21 The cut-off for low contribution was set at a cumulative contribution of 90%. Note: Group II and III have been  
 22 combined for this analysis as they were not significantly different ( $P < 0.05$ ) according to ANOSIM test.

| <b>Higher taxonomic group</b> | <b>Phylum/class</b> | <b>OTU-ID (97%)</b> | <b>Contribution %</b> | <b>Cumulative %</b> |
|-------------------------------|---------------------|---------------------|-----------------------|---------------------|
| <b>SAR11</b>                  | Alphaproteobacteria | 1                   | 9.02                  | 66.67               |
| <b>SAR86</b>                  | Gammaproteobacteria | 3                   | 3.31                  | 69.99               |
| <b>NS5</b>                    | Bacteroidetes       | 7                   | 2.32                  | 72.31               |
| <b>Rhodobacteraceae</b>       | Alphaproteobacteria | 11                  | 1.9                   | 74.21               |
| <b>SAR11</b>                  | Alphaproteobacteria | 2                   | 1.82                  | 76.03               |
| <b>SAR406</b>                 | Deferribacteres     | 25                  | 1.6                   | 77.63               |
| <b>Planctomycetaceae</b>      | Planctomycetes      | 42                  | 1.44                  | 79.07               |
| <b>NS4</b>                    | Bacteroidetes       | 5                   | 1.38                  | 80.45               |
| <b>SAR116</b>                 | Alphaproteobacteria | 9                   | 1.17                  | 81.62               |
| <b>NS4</b>                    | Bacteroidetes       | 13                  | 1.07                  | 82.69               |
| <b>SAR86</b>                  | Gammaproteobacteria | 14                  | 0.87                  | 83.55               |
| <b>Rhodobacteraceae</b>       | Alphaproteobacteria | 4                   | 0.82                  | 84.37               |
| <b>Flavobacteraceae</b>       | Bacteroidetes       | 63                  | 0.75                  | 85.12               |
| <b>Unclassified</b>           | Bacteroidetes       | 44                  | 0.71                  | 85.82               |
| <b>Alteromonadaceae</b>       | Gammaproteobacteria | 19                  | 0.69                  | 86.52               |
| <b><i>Synechococcus</i></b>   | Cyanobacteria       | 24                  | 0.6                   | 87.12               |
| <b>SAR92</b>                  | Gammaproteobacteria | 22                  | 0.59                  | 87.7                |
| <b>NS5</b>                    | Bacteroidetes       | 15                  | 0.54                  | 88.25               |
| <b>Unclassified</b>           | Proteobacteria      | 46                  | 0.47                  | 88.71               |
| <b>Aeromonadaceae</b>         | Gammaproteobacteria | 73                  | 0.41                  | 89.12               |
| <b>Puniceicoccaceae</b>       | Verrucomicrobia     | 57                  | 0.4                   | 89.52               |
| <b>(Rickettsiales)</b>        | Alphaproteobacteria | 33                  | 0.39                  | 89.91               |
| <b><i>Pseudospirillum</i></b> | Gammaproteobacteria | 30                  | 0.36                  | 90.27               |

23 **A:** Group I (Average similarity=88.69%)

| Higher taxonomic group   | Phylum/class        | OTU-ID (97%) | Contribution % | Cumulative % |
|--------------------------|---------------------|--------------|----------------|--------------|
| <b>Rhodobacteraceae</b>  | Alphaproteobacteria | 11           | 5.50           | 63.21        |
| <b>SAR11</b>             | Alphaproteobacteria | 10           | 2.89           | 66.10        |
| <b>Owenweeksia</b>       | Bacteroidetes       | 6            | 2.10           | 70.77        |
| <b>Flavobacteraceae</b>  | Bacteroidetes       | 26           | 2.08           | 72.84        |
| <b>Glaciecola</b>        | Gammaproteobacteria | 8            | 1.79           | 74.64        |
| <b>SAR11</b>             | Alphaproteobacteria | 1            | 1.71           | 76.35        |
| <b>Flavobacteraceae</b>  | Bacteroidetes       | 63           | 1.55           | 75.90        |
| <b>Roseobacter clade</b> | Alphaproteobacteria | 21           | 1.37           | 79.27        |
| <b>Rhodobacteraceae</b>  | Alphaproteobacteria | 4            | 1.24           | 80.51        |
| <b>NS5</b>               | Bacteroidetes       | 15           | 1.19           | 81.70        |
| <b>NS4</b>               | Bacteroidetes       | 13           | 1.12           | 82.81        |
| <b>Flavobacteraceae</b>  | Bacteroidetes       | 29           | 1.05           | 83.86        |
| <b>NS5</b>               | Bacteroidetes       | 7            | 0.97           | 84.83        |
| <b>NS4</b>               | Bacteroidetes       | 5            | 0.95           | 85.78        |
| <b>Roseobacter clade</b> | Alphaproteobacteria | 37           | 0.93           | 86.71        |
| <b>SAR86</b>             | Gammaproteobacteria | 3            | 0.90           | 83.60        |
| <b>Planctomycetaceae</b> | Planctomycetes      | 42           | 0.82           | 88.43        |
| <b>Flavobacteraceae</b>  | Bacteroidetes       | 32           | 0.78           | 89.21        |
| <b>Rhodobacteraceae</b>  | Alphaproteobacteria | 162          | 0.69           | 89.90        |
| <b>Pseudospirillum</b>   | Gammaproteobacteria | 30           | 0.63           | 90.53        |

24 **B: Group II+III (Average similarity=86.64%)**

25

26

| Higher taxonomic group  | Phylum/class        | OUT-ID (97%) | Contribution % | Cumulative % |
|-------------------------|---------------------|--------------|----------------|--------------|
| <b>Glaciecola</b>       | Gammaproteobacteria | 8            | 8.25           | 65.84        |
| <b>Rhodobacteraceae</b> | Alphaproteobacteria | 11           | 5.85           | 71.69        |
| <b>SAR11</b>            | Alphaproteobacteria | 10           | 3.09           | 74.78        |
| <b>SAR11</b>            | Alphaproteobacteria | 1            | 2.64           | 77.42        |

|                          |                     |    |      |       |
|--------------------------|---------------------|----|------|-------|
| <b>Owenweeksia</b>       | Bacteroidetes       | 6  | 2.48 | 79.9  |
| <b>Roseobacter clade</b> | Alphaproteobacteria | 21 | 2.21 | 82.1  |
| <b>Rhodobacteraceae</b>  | Alphaproteobacteria | 4  | 1.37 | 83.48 |
| <b>SA86</b>              | Gammaproteobacteria | 3  | 1.32 | 84.8  |
| <b>Flavobacteraceae</b>  | Bacteroidetes       | 26 | 0.95 | 85.75 |
| <b>Flavobacteraceae</b>  | Bacteroidetes       | 29 | 0.92 | 86.67 |
| <b>NS4</b>               | Bacteroidetes       | 13 | 0.9  | 87.57 |
| <b>Flavobacteraceae</b>  | Bacteroidetes       | 32 | 0.85 | 88.42 |
| <b>Roseobacter clade</b> | Alphaproteobacteria | 37 | 0.71 | 89.14 |
| <b>NS5</b>               | Bacteroidetes       | 7  | 0.68 | 89.82 |
| <b>Pseudospirillum</b>   | Gammaproteobacteria | 30 | 0.66 | 90.48 |

27 **C: Group IV (Average similarity=88.80%)**

28

29

30

31

32

33

34

35

36

37

38

39

40

41

42 Fig S1. Distribution of prokaryotic groups in surface waters of the GON as determined by flow cytometry. A)  
43 *Synechococcus*, B) *Prochlorococcus*, C) Heterotrophic Bacteria. Cell abundance for each group is shown  
44 as Cells ml<sup>-1</sup>.

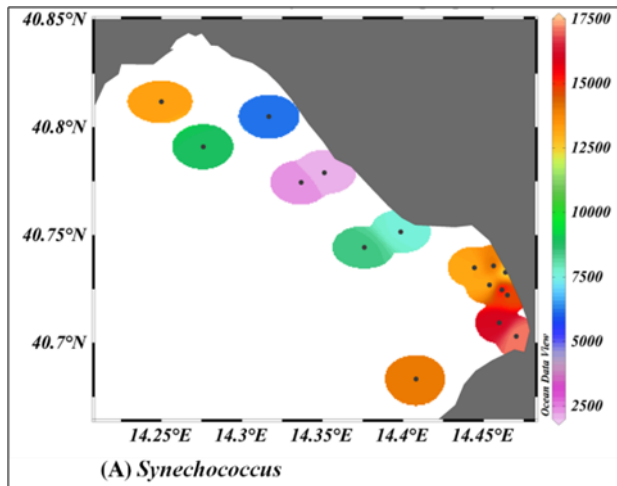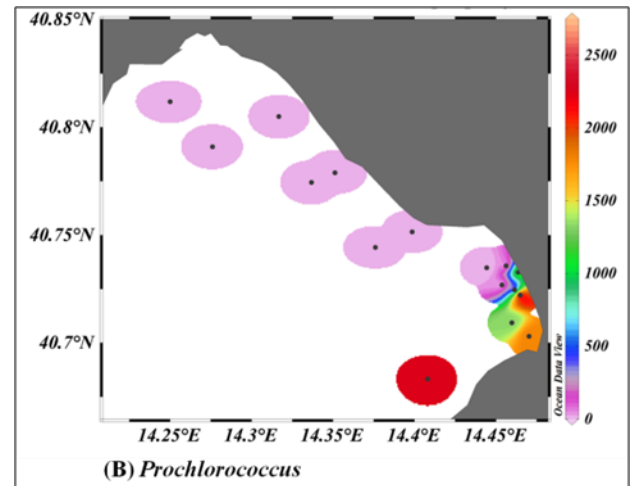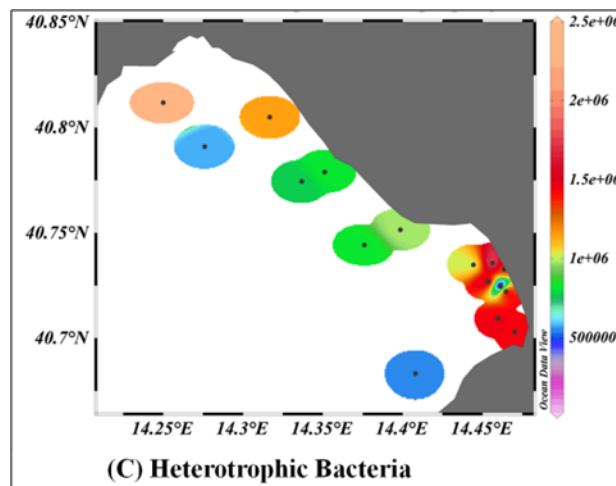

45

46

47

48

49

50

51

52

53

54 Fig S2. Rarefaction curves of the observed OTUs (a), Chao I richness estimator (b), and Shannon diversity index  
55 (c).

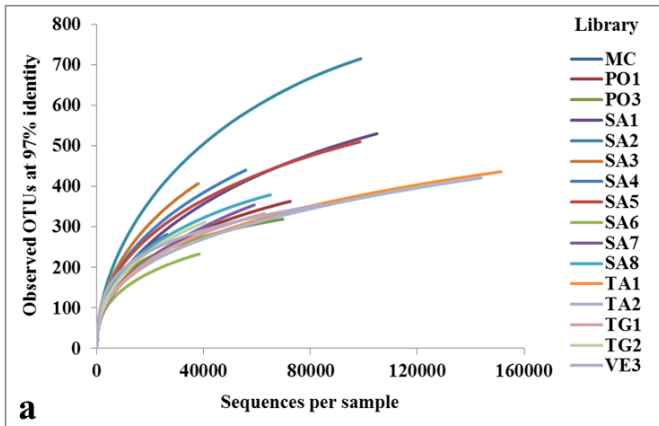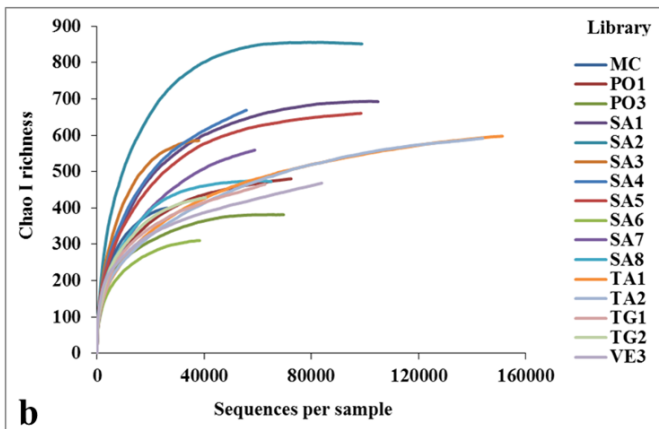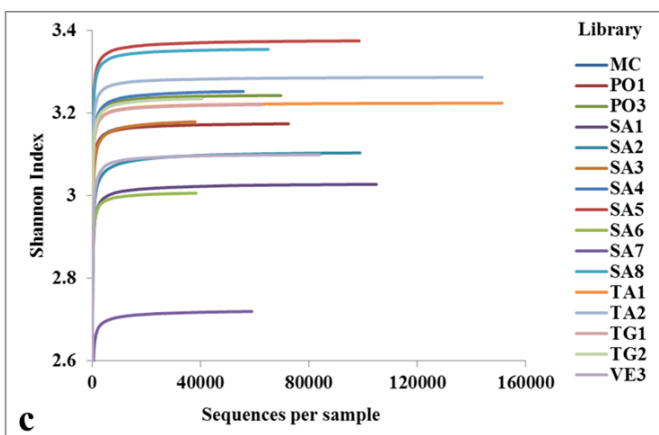

Supplement: AEM.00494-17_zam999118020s1.pdf [file AEM.00494-17_zam999118020s1.pdf]
